# Supplementary material for: High performance, self-powered photodetectors based on a graphene/silicon Schottky junction diode
Source: Royal Society of Chemistry journal article supplement (doi:10.1039/c8tc02786b), 2018-01-01
Supplement: c8tc02786b1.pdf [file c8tc02786b1.pdf]

## *Supporting Information*

### **High performance, self-powered photodetectors based on graphene/silicon Schottky junction diode**

*Dharmaraj Periyannagounder<sup>1,2</sup> Paulraj Gnanasekar<sup>1</sup> Purushothaman Varadhan<sup>2</sup> Jr-Hau He<sup>2</sup> and Jeganathan Kulandaivel<sup>1\*</sup>*

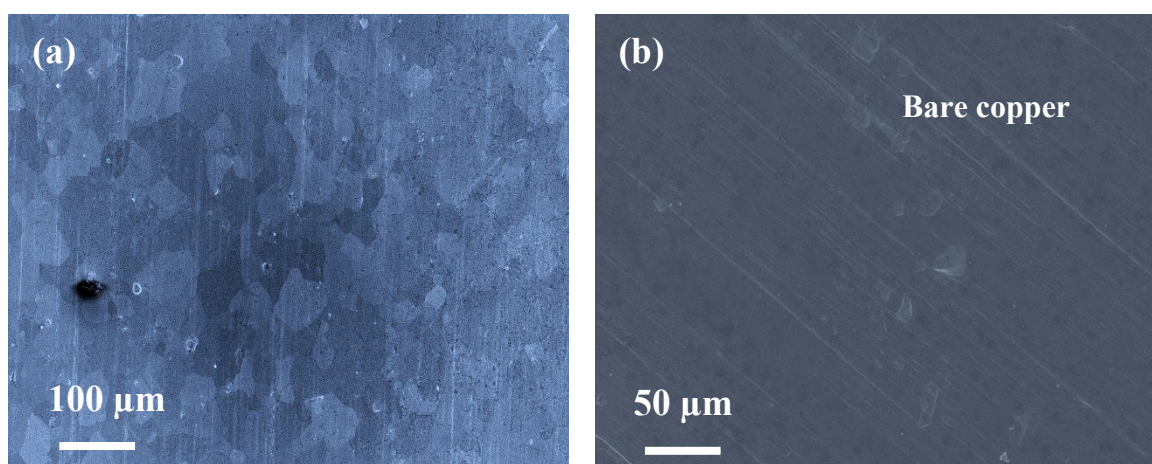

**Figure S1:** FESEM images of (a) graphene grown on copper and (b) bare copper foil

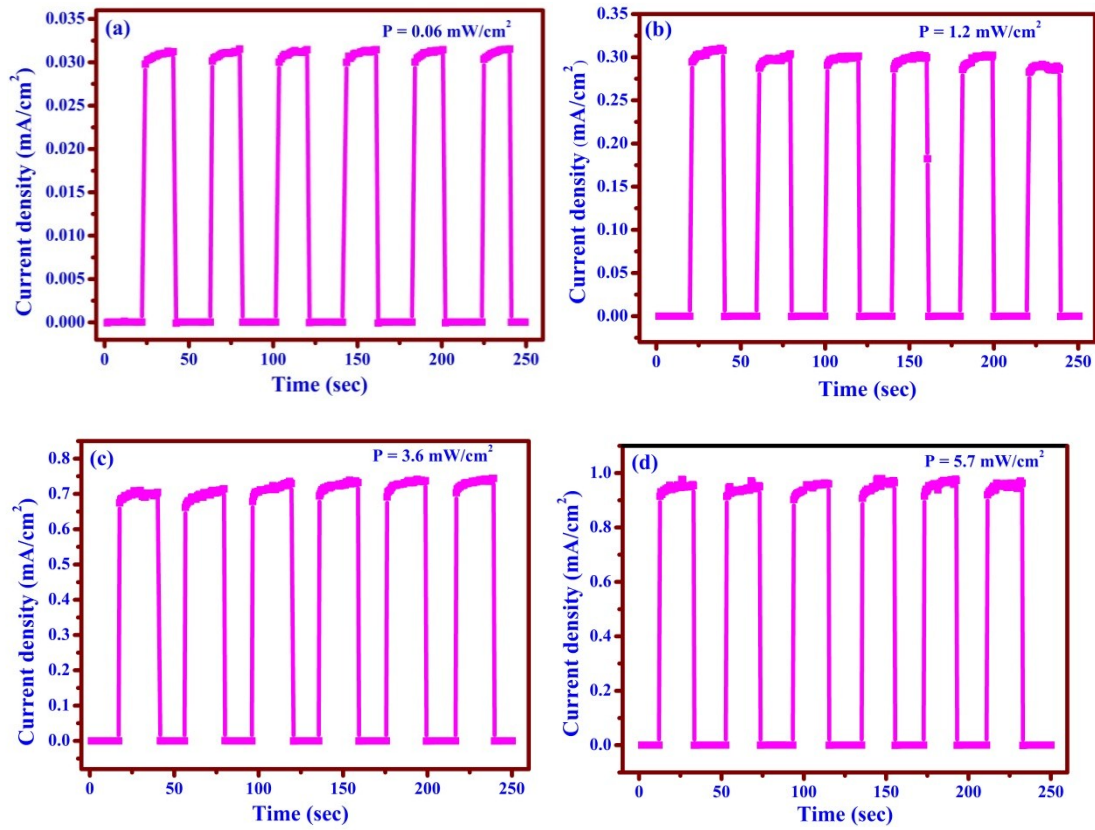

**Figure S2:** Time dependent photocurrent response of the Gr/Si vdW heterojunction photodetector for various power densities under self-powered conditions (532 nm).

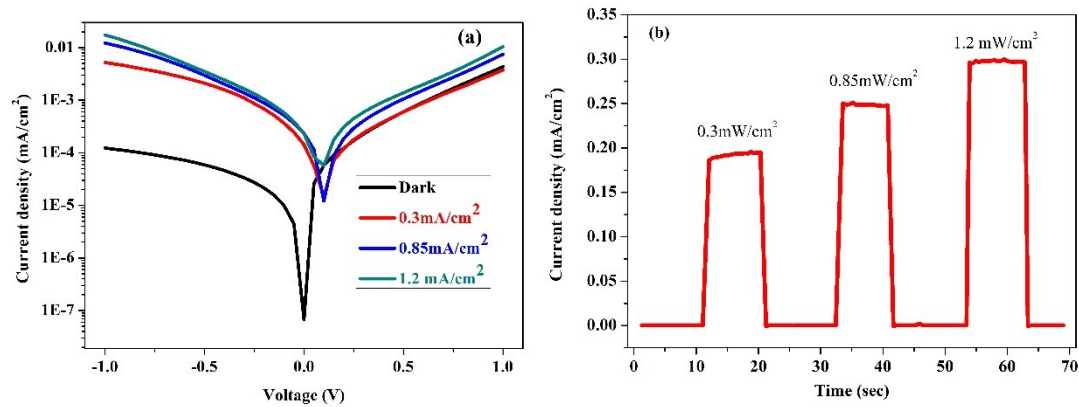

**Figure S3:** (a) J-V characteristics of Gr/Si vdW Schottky junction for various laser powers (660 nm) and (b) Photo response of the Gr/Si vdW heterojunction photodetector for various power densities under self-powered conditions (660 nm).

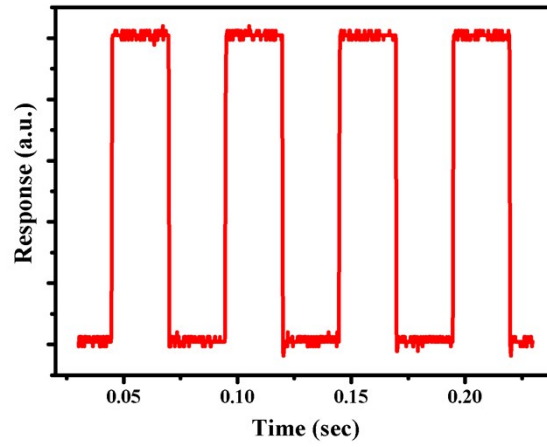

**Figure S4:** Transient photo response of the Gr/Si vdW Schottky junction diode upon the illumination of 532 nm laser.

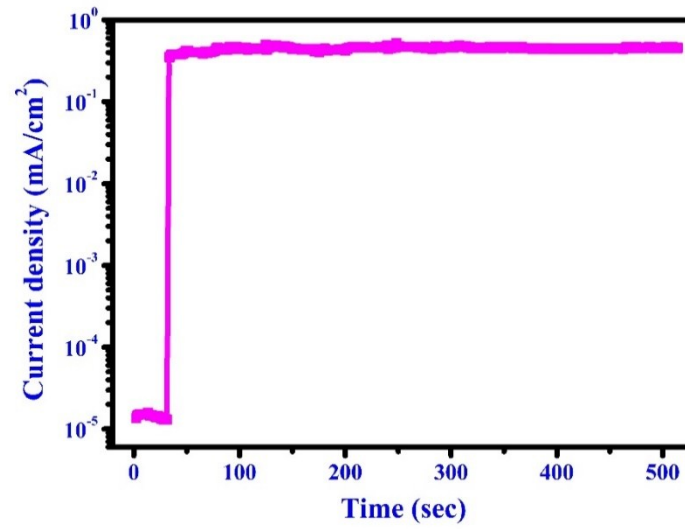

**Figure S5:** Photocurrent stability of the device under self-powered conditions.
